# Supplementary material
Source: Springer Nature journal article supplement (https://www.springermedizin.de/resource/supplementary/12865_2012_520_MOESM3_ESM.pdf/9428124)

**A**

- WT
- ◆ *Tg*
- ▲ *Batf<sup>AZ/AZ</sup>*

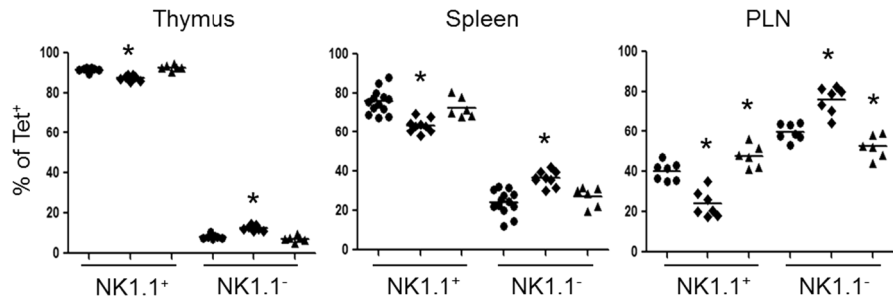**B**

PLN iNKT  
 ■ NK1.1<sup>+</sup>  
 ■ NK1.1<sup>-</sup>

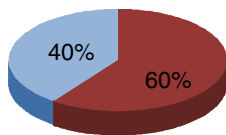*WT*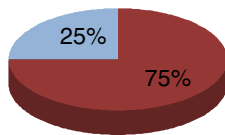*Tg*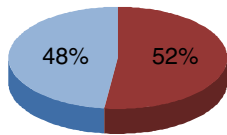*Batf<sup>AZ/AZ</sup>*

Supplement: MOESM3 [file 9428124]
